# Supplementary material
Source: PubMed Central journal article supplement (PMC380979)
Supplement: 7600124s1.pdf [file 7600124s1.pdf]

## Supplementary Data:

### Yeast strains:

|          |                                                                              |       |                         |
|----------|------------------------------------------------------------------------------|-------|-------------------------|
| YEF241   | Mat <b>a</b>                                                                 | -     | E. Bi                   |
| YEF313   | Mat <b>a</b> <i>cdc24-4</i>                                                  | -     | E. Bi                   |
| YMP1054  | Mat <b>a</b> <i>far1::LEU2</i>                                               | W303  | S. Henchoz et al., 1997 |
| YMG315   | Mat <b>a</b> <i>cdc24Δ-1::HIS5</i> pGN6                                      | S288c | Y. Shimada              |
| YYS39    | Mat <b>a</b> <i>cdc24Δ-1::HIS5</i> pYS24                                     | S288c | This study              |
| YYS132   | Mat <b>a</b> <i>cdc24Δ-1::HIS5</i> pYS154                                    | S288c | This study              |
| YMG258   | Mat <b>a</b> <i>cln1::HISG, cln2Δ, cln3::leu2::HISG, trp::MET-CLN2::TRP1</i> | W303  | Gulli et al., 2000      |
| YACB191  | Mat <b>a</b> <i>bud1::URA3</i>                                               | EG123 | This study              |
| YPW73    | Mat <b>a</b> <i>bud1::URA3 trp1::CYC1 CDC24-GFP::TRP1</i>                    | EG123 | This study              |
| DLY1     | Mat <b>a</b>                                                                 | -     | D. Lew                  |
| MOSY0124 | Mat <b>a</b> <i>cdc42-27</i>                                                 | -     | D. Lew                  |
| YYS238   | Mat <b>α</b> <i>cdc24-5 ura3::LexA-LacZ::URA3</i>                            | W303  | This study              |
| YPW87    | Mat <b>a</b> <i>cdc24-4</i>                                                  | W303  | This study              |
| YPW81    | Mat <b>a</b> <i>cdc24::HISG, pRS414 pro24 Cdc24-m1</i>                       | W303  | This study              |
| YMP324   | Mat <b>α</b> <i>lys1</i>                                                     | -     | I. Herskowitz           |
| YMP325   | Mat <b>α</b> <i>lys1, far1-c</i>                                             | -     | I. Herskowitz           |

### Plasmids:

|        |                                |                    |
|--------|--------------------------------|--------------------|
| pTP513 | BD CDC24 pEG202                | Butty et al., 1998 |
| pYS174 | BD N(CDC24) pEG202             | This study         |
| pYS259 | BD C(CDC24) pEG202             | This study         |
| pYS164 | BD CDC24-G168D pEG202          | This study         |
| pYS165 | BD CDC24-S189P pEG202          | This study         |
| pTP449 | BD CDC42-C188S pEG202          | C. Boone           |
| pYS369 | BD CDC24-ΔPB1 pEG202           | This study         |
| pYS370 | BD CDC24-ΔC pEG202             | This study         |
| pTP616 | AD BUD1-G12V pJG4-6            | This study         |
| ACB412 | AD FAR1 pJG4-6                 | Butty, A.-C.       |
| ACB464 | AD BEM1-GFP pJG4-6             | Butty, A.-C.       |
| pYS405 | AD CRIB(STE20)                 | This study         |
| pYS261 | AD C(CDC24) pJG4-6             | This study         |
| pYS262 | AD PB1(CDC24) pJG4-6           | This study         |
| pGN5   | CDC24 URA3 CEN                 | Y. Shimada         |
| pGN4   | CDC24 LEU2 CEN                 | Y. Shimada         |
| pYS254 | CDC24-ΔCH LEU2 CEN             | This study         |
| pYS255 | CDC24-ΔDH LEU2 CEN             | This study         |
| pYS48  | ADH CDC24-GFP URA3 CEN         | This study         |
| pYS242 | ADH CDC24-ΔCH-GFP URA3 CEN     | This study         |
| pYS321 | ADH CDC24-ΔDH-GFP URA3 CEN     | This study         |
| pYS24  | CYC1 CDC24-GFP LEU2 CEN        | Y. Shimada         |
| pYS154 | CYC1 CDC24-G168D-GFP LEU2 CEN  | This study         |
| pYS381 | GAL1 HA-BUD1-G12V URA3 2μ      | This study         |
| pYS382 | GAL1 HA-BUD1-G12V/T35A URA3 2μ | This study         |
| MJ792  | ADH GIC2-GFP URA3 CEN          | M. Jaquenoud       |
| pPB161 | BUD1 LEU2 2μ                   | H.-O. Park         |

|        |                                            |            |
|--------|--------------------------------------------|------------|
| pPB264 | BUD1-G12V LEU2 2 $\mu$                     | H.-O. Park |
| pPB267 | BUD1-K16N LEU2 2 $\mu$                     | H.-O. Park |
| pYS150 | GALL myr-CDC24-GFP TRP1 CEN                | This study |
| pYS151 | GALL myrG2A-CDC24-GFP TRP1 CEN             | This study |
| pYS147 | GALL myr-CDC24-GFP LEU2 CEN                | This study |
| pYS249 | GALL myr-CDC24- $\Delta$ DH-GFP LEU2 CEN   | This study |
| pYS160 | GALL myr-CDC24-G168D-GFP TRP1 CEN          | This study |
| pYS176 | GALL myr-CDC24-S189P-GFP TRP1 CEN          | This study |
| pYS379 | TEF HA-BUD1-G12V TRP1 CEN                  | This study |
| pYS380 | TEF HA-BUD1-G12V/T35A TRP1 CEN             | This study |
| pYS146 | GALL myr-CDC24 LEU2 CEN                    | This study |
| pYS197 | GALL myr-CDC24-I514V LEU2 CEN              | This study |
| pYS194 | GALL myr-CDC24-K754E LEU2 CEN              | This study |
| pYS195 | GALL myr-CDC24-G644C LEU2 CEN              | This study |
| pYS196 | GALL myr-CDC24-G621D LEU2 CEN              | This study |
| pYS289 | GALL myr-CDC24-G644C/ $\Delta$ DH LEU2 CEN | This study |
| pYS202 | CDC24-G644C LEU2 CEN                       | This study |
| pYS241 | GALL myr-CDC24- $\Delta$ CH LEU2 CEN       | This study |
| pYS282 | GALL myr-CDC24- $\Delta$ N154 LEU2 CEN     | This study |
| pYS283 | GALL myr-CDC24- $\Delta$ N284 LEU2 CEN     | This study |
| pYS295 | GALL myr-CDC24- $\Delta$ PB1 LEU2 CEN      | This study |
| pYS263 | GALL myr-CDC24- $\Delta$ C LEU2 CEN        | This study |
| pYS315 | GALL myr-CDC24- $\Delta$ PB1-GFP LEU2 CEN  | This study |
| pYS314 | GALL myr-CDC24- $\Delta$ C-GFP LEU2 CEN    | This study |
| pYS310 | GAL1 PB1(CDC24) URA3 2 $\mu$               | This study |
| pYS308 | GAL1 C(CDC24) URA3 2 $\mu$                 | This study |
| pYS392 | GAL1 HA-BEM1-GFP URA3 CEN                  | This study |
| pYS383 | GAL1 HA-PB1(BEM1)-GFP URA3 CEN             | This study |
| pYS391 | GAL1 HA-PB1-m1(BEM1)-GFP URA3 CEN          | This study |
| pYS336 | GAL1 GFP-BEM2 LEU CEN                      | This study |
